# Supplementary material
Source: PubMed Central journal article supplement (PMC3840044)

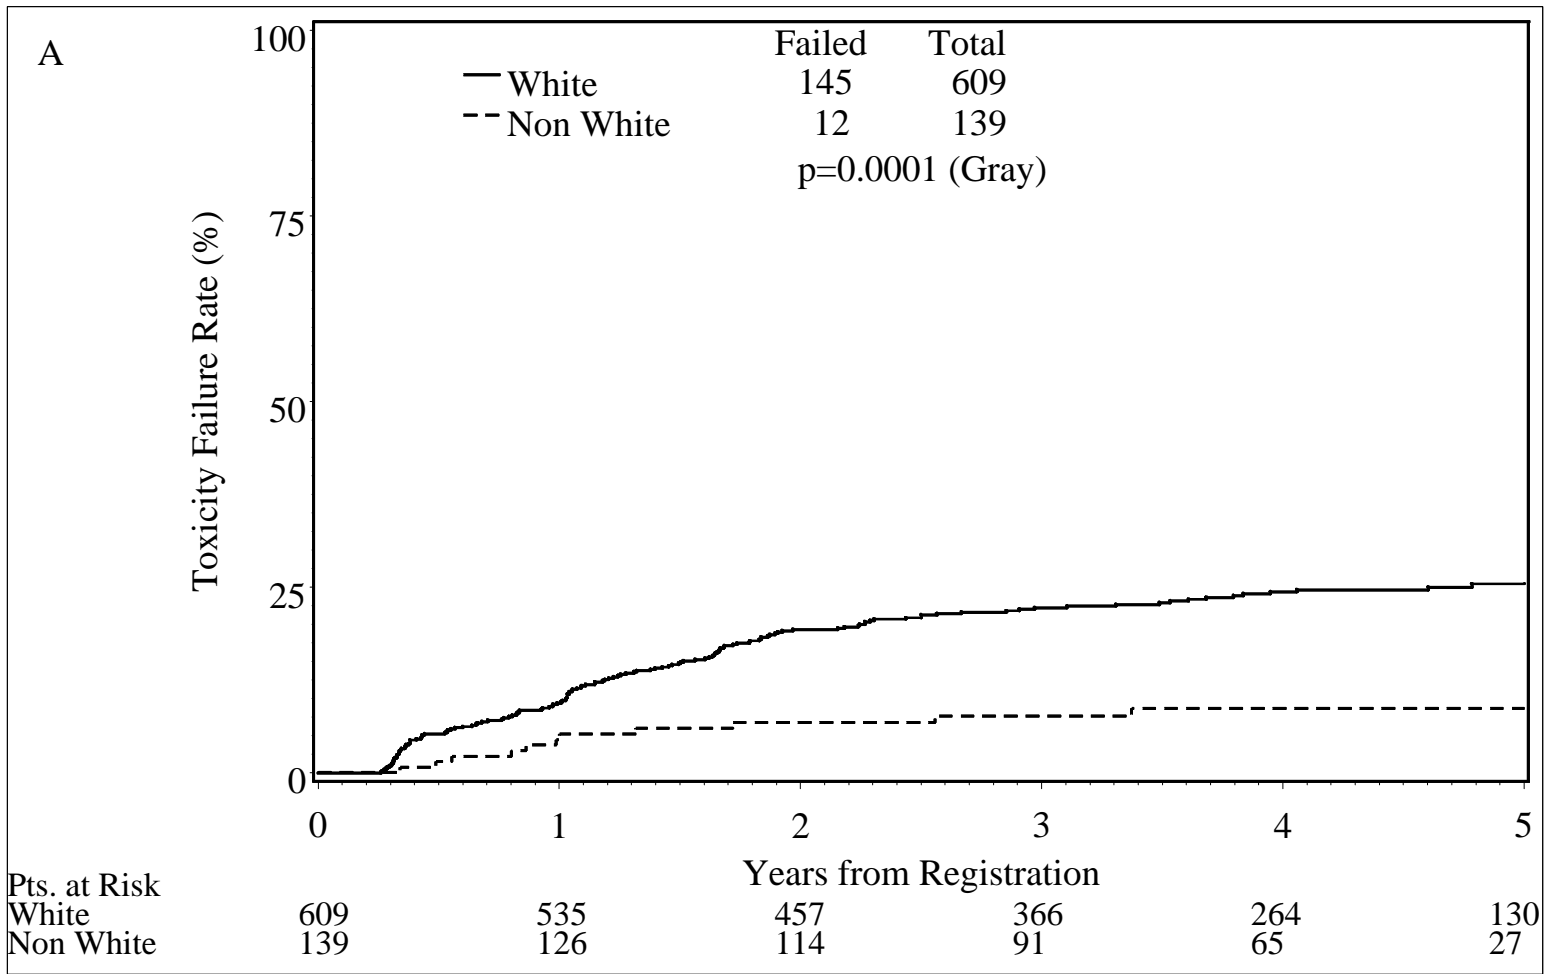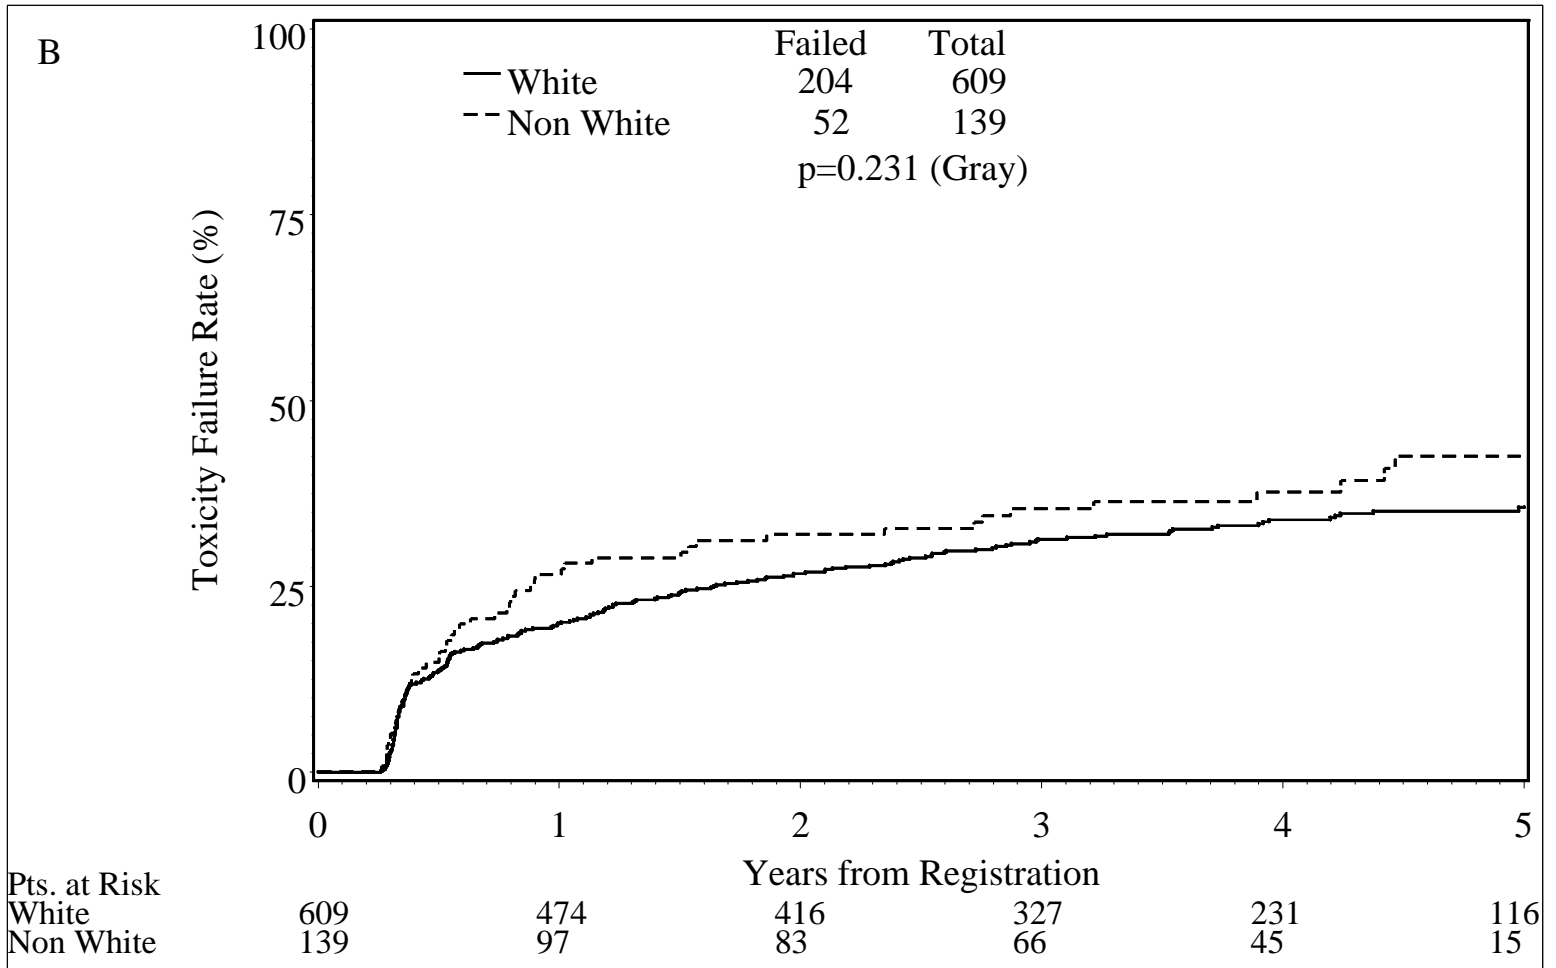

Supplement: NIHMS514244-supplement-01.pdf [file NIHMS514244-supplement-01.pdf]
